# Supplementary material for: Characteristics of relief and residual low back pain after discectomy in patients with lumbar disc herniation: analysis using a detailed visual analogue scale
Source: Research Square preprint supplement (doi:10.21203/rs.3.rs-50029/v3), 2021-01-19
Supplement: Supplementary file 1 [file 01cf44a581be3de611ee3e99.xlsx]

## Sheet: Sheet1
	Table 5. Time course changes of
	A. Pfirrmann grade
			1 year after surgery
			2	3	4	5		Total
	Before surgery	2		2				2
		3		26	13			39
		4			17	2		19
		5				2		2
		Total		28	30	4		62
	B. Modic type
			1 year after surgery
			None	1	2	3		Total
	Before surgery	None	40	4	3	1		48
		1		2	1			3
		2		1	8	1		10
		3		1				1
		Total	40	8	12	2		62
